# Supplementary material for: Associations among High-Quality Protein and Energy Intake, Serum Transthyretin, Serum Amino Acids and Linear Growth of Children in Ethiopia
Source: MDPI journal article supplement (doi:10.3390/nu10111776), 2018-11-16
Supplement: s1 [file s1]

**Table S1:** Infant and Young child Feeding Indicators

| Variables                                                    | Total<br>(n=868) | Stunted<br>(n=258) | Non-stunted<br>(n=610) |
|--------------------------------------------------------------|------------------|--------------------|------------------------|
| Prevalence of child ever being breastfed, %                  | 99.7             | 99.6               | 99.7                   |
| Prevalence of initiation of breastfeeding (within 1 hour), % | 71               | 67                 | 73                     |
| Prevalence of colostrum/ first milk feeding, %               | 74               | 71                 | 76                     |
| Prevalence of pre-lacteal feeding, %                         | 3                | 4                  | 3                      |
| Prevalence of exclusively breastfeeding for 6 months, %      | 53               | 53                 | 53                     |
| Complementary feeding started At 6 month, %                  | 50               | 50                 | 49                     |
| Prevalence of bottle feeding, %                              | 4                | 4                  | 4                      |
